# Supplementary material for: Modeling the ecologic niche of plague in sylvan and domestic animal hosts to delineate sources of human exposure in the western United States
Source: PeerJ. 2015 Dec 14;3:e1493. doi: 10.7717/peerj.1493 (PMC4690378; doi:10.7717/peerj.1493)
Supplement: Supplemental Information 1 [file peerj-03-1493-s003.xlsx]

## Sheet: Sheet1
id	archive	state	county	latitude	longitude	host	date
1	2.00008e+07	Colorado	Pueblo	38.3559	-104.735	prairie dogs	2000-07-31
2	2.00009e+07	Montana	Blaine	48.2137	-108.585	prairie dogs	2000-09-06
3	2.00104e+07	Texas	Potter/Moore/Hutchinson	35.5882	-101.664	prairie dogs	2001-04-25
4	2.00105e+07	Colorado	Jefferson	39.6493	-105.154	prairie dogs	2001-05-23
5	2.00106e+07	Nevada	Clark	36.2645	-115.605	feral cat	2001-06-27
6	2.00107e+07	California	El Dorado	38.9354	-120.056	chipmunk	2001-07-20
7	2.00205e+07	Colorado	Jefferson	39.5338	-105.092	prairie dogs	2002-05-02
8	2.00208e+07	California	Nevada/Placer	39.3273	-120.233	squirrel	2002-08-27
9	2.00308e+07	Colorado	El Paso	38.6951	-104.473	prairie dogs	2003-08-09
10	2.00309e+07	Montana	Beaverhead	45.1958	-113.508	mule deer	2003-07-31
11	2.00311e+07	Nevada	Clark	36.2645	-115.605	gray fox	2003-11-12
12	2.00405e+07	New Mexico	Santa Fe	35.4899	-105.974	domestic cat	2004-04-30
13	2.00405e+07	Texas	Midland/Glasscock	31.8645	-101.778	wood rat	2004-05-06
14	2.00405e+07	Texas	Dallam	36.3975	-102.265	prairie dogs	2004-05-20
15	2.00406e+07	Colorado	Weld	40.6815	-104.524	prairie dogs	2004-06-12
16	2.00408e+07	Colorado	Larimer	40.8483	-105.547	domestic cat	2004-08-26
17	2.00409e+07	Colorado	Jefferson	39.6458	-105.221	domestic cat	2004-09-01
18	2.0041e+07	Colorado	El Paso	38.8672	-104.877	squirrel	2004-10-21
19	2.00507e+07	Wyoming	Laramie	41.173	-104.888	domestic cat	2005-07-09
20	2.00508e+07	Colorado	Boulder	40.0705	-105.252	prairie dogs	2005-08-19
21	2.00602e+07	Colorado	Mesa	39.1052	-108.677	domestic cat	2006-02-16
22	2.00605e+07	California	San Luis Obispo County	35.3757	-120.85	squirrel	2006-05-28
23	2.00606e+07	Colorado	Weld	40.747	-103.914	prairie dogs	2006-06-27
24	2.00606e+07	Arizona	Coconino	35.2045	-111.405	domestic cat	2006-06-30
25	2.01506e+07	Colorado	El Paso	38.8625	-104.871	mule deer	2015-06-19
26	2.01506e+07	Colorado	Jefferson	39.6534	-105.157	prairie dogs	2015-06-26
27	2.01505e+07	Idaho	Ada	43.1334	-116.019	ground squirrel	2015-05-27
28	2.01506e+07	Nebraska	Sioux/Dawes	42.8712	-103.709	prairie dogs	2014-10-31
29	2.01505e+07	Arizona	Yavapai	34.7469	-112.108	domestic cat	2015-05-08
30	2.01501e+07	New Mexico	Santa Fe	35.6253	-105.984	mouse and dog and domestic cat	2014-11-15
31	2.01408e+07	California	San Diego	33.3185	-116.881	squirrel	2014-08-02
32	2.01407e+07	New Mexico	Santa Fe	35.0739	-106.202	mountain lion and coati	2014-07-25
33	2.01309e+07	California	San Diego	33.3398	-116.911	squirrel	2013-09-17
34	2.01307e+07	California	Los Angeles	34.3939	-117.697	squirrel	2013-07-16
35	2.01306e+07	California	San Diego	33.3439	-116.901	squirrel	2013-06-12
36	2.01305e+07	California	San Diego	33.3398	-116.911	squirrel	2013-05-12
37	2.01212e+07	South Dakota	Lyman and Stanley and Jones	44.1295	-100.271	prairie dogs	2012-11-28
38	2.0121e+07	California	El Dorado	38.9357	-120.054	chipmunk	2012-10-12
39	2.0121e+07	California	Riverside	33.7886	-116.739	squirrel	2012-10-04
40	2.01209e+07	Colorado	El Paso	38.9385	-104.717	wild rabbit	2012-09-14
41	2.01208e+07	California	San Diego	33.3398	-116.911	squirrel	2012-08-22
42	2.01208e+07	California	San Diego	33.3439	-116.901	squirrel	2012-08-22
43	2.01107e+07	New Mexico	Sandoval	35.2872	-106.716	dog	2011-06-28
44	2.01106e+07	Colorado	Boulder	40.0218	-105.286	squirrel	2011-06-03
45	2.01106e+07	Colorado	Boulder	40.0221	-105.289	domestic cat	2011-06-03
46	2.01106e+07	Oregon	Crook	44.3018	-120.864	domestic cat	2011-06-09
47	2.01104e+07	New Mexico	Rio Arriba	36.2072	-106.319	domestic cat	2011-04-13
48	2.01008e+07	California	Plumas	39.7562	-120.696	rodent	2010-08-14
49	2.01008e+07	Montana	Madison	45.3462	-111.73	domestic cat	2010-08-07
50	2.01007e+07	California	Los Angeles	34.7005	-118.806	squirrel	2010-07-03
51	2.01004e+07	New Mexico	Quay	35.1154	-103.336	dog	2010-04-12
52	2.00912e+07	California	Kern	35.2458	-118.605	domestic cat	2009-12-04
53	2.00907e+07	South Dakota		43.8422	-102.325	prairie dogs	2009-07-11
54	2.00906e+07	New Mexico	Taos	36.5328	-105.666	domestic cat	2009-06-01
55	2.00904e+07	New Mexico	Santa Fe	35.7129	-105.938	wild rabbit	2009-04-03
56	2.00807e+07	Colorado	Pueblo	38.3622	-104.709	wild rabbit	2008-07-25
57	2.00807e+07	South Dakota		43.7825	-102.24	prairie dogs	2008-07-15
58	2.00709e+07	New Mexico	Lincoln	33.3548	-105.673	domestic cat	2007-09-06
59	2.00708e+07	Arizona	Coconino	35.27	-111.517	prairie dogs	2007-07-15
60	2.00707e+07	Colorado	El Paso	38.8025	-104.516	prairie dogs	2007-07-24
61	2.00707e+07	California	Los Angeles	34.2849	-118.224	squirrel	2007-07-19
62	2.01507e+07	Utah	Uintah	40.1416	-109.084	prairie dogs	2015-07-06
63	2.00705e+07	Colorado	Denver	39.7501	-104.955	hooded capuchin monkey	2007-05-21
64	2.00705e+07	Colorado	Jefferson	39.5662	-105.083	squirrel	2007-05-04
65	2.01507e+07	Colorado	Jefferson	39.7575	-105.222	squirrel	2015-07-24
66	2.01508e+07	California		37.8735	-119.357	squirrel	2015-08-14
